# Supplementary material for: Design, Synthesis and Biological Evaluation of New Carbohydrate-Based Coumarin Derivatives as Selective Carbonic Anhydrase IX Inhibitors via “Click” Reaction
Source: MDPI journal article supplement (doi:10.3390/molecules27175464), 2022-08-25

# Design, synthesis and biological evaluation of new carbohydrate-based coumarin derivatives as selective carbonic anhydrase IX inhibitors via “click” reaction

Naying Chu <sup>1,2,†</sup>, Yitong Wang <sup>3,†</sup>, Hao Jia <sup>1</sup>, Jie Han <sup>1</sup>, Xiaoyi Wang <sup>1</sup> and Zhuang Hou <sup>3,\*</sup>

<sup>1</sup> Department of Pharmacy, The First People's Hospital of Shangqiu, Suiyang District, 292 Kaixuan Road, Shangqiu 476000, China;

<sup>2</sup> China-Japan Research Institute of Medical and Pharmaceutical Sciences, Shenyang Pharmaceutical University, 103 Wenhua Road, Shenyang 110016, China

<sup>3</sup> Key Laboratory of Structure-Based Drugs Design and Discovery (Ministry of Education), Shenyang Pharmaceutical University, Shenyang 110016, China

\* Correspondence: [houzhuang8@sina.com](mailto:houzhuang8@sina.com)

† These authors contributed equally to this work.

The <sup>1</sup>H and <sup>13</sup>C NMR spectra were recorded at 600 MHz and 150 MHz on a Bruker ARX 600 MHz spectrometer using (CD<sub>3</sub>)<sub>2</sub>SO as solvents with TMS as the internal standard. The NMR spectra were analyzed and interpreted using MestReNova. The solvent peaks were 2.5 ppm and 40 ppm in the <sup>1</sup>H and <sup>13</sup>C NMR spectra, respectively.

---

Figures S1. The  $^1\text{H}$ -NMR spectrum of 7- [(1- $\beta$ -D-glucopyranosyl-1H-1,2,3-triazol-4-yl) methoxy]-2H-chromen-2-one (**10a**)

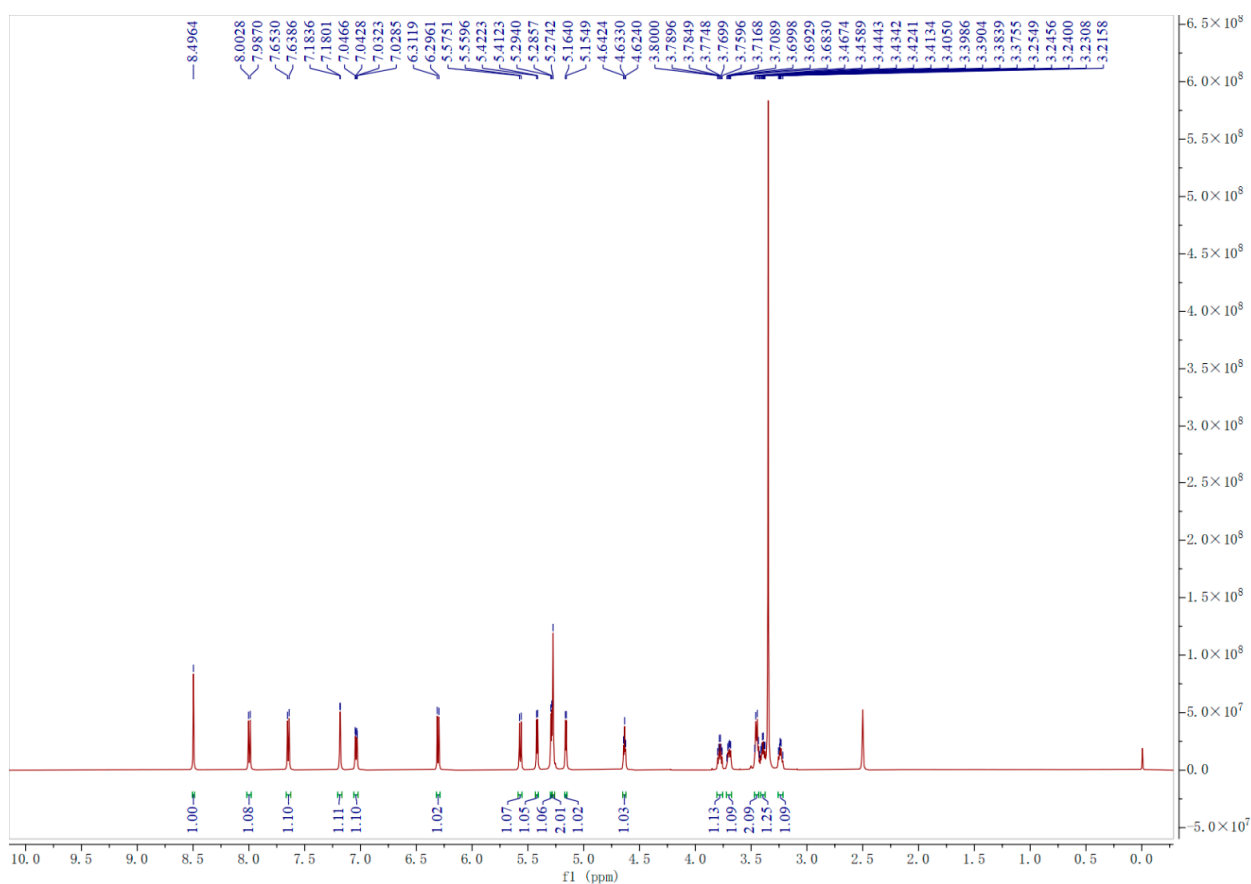

Figures S2. The  $^{13}\text{C}$ -NMR spectrum of 7- [(1- $\beta$ -D-glucopyranosyl-1H-1,2,3-triazol-4-yl) methoxy]-2H-chromen-2-one (**10a**)

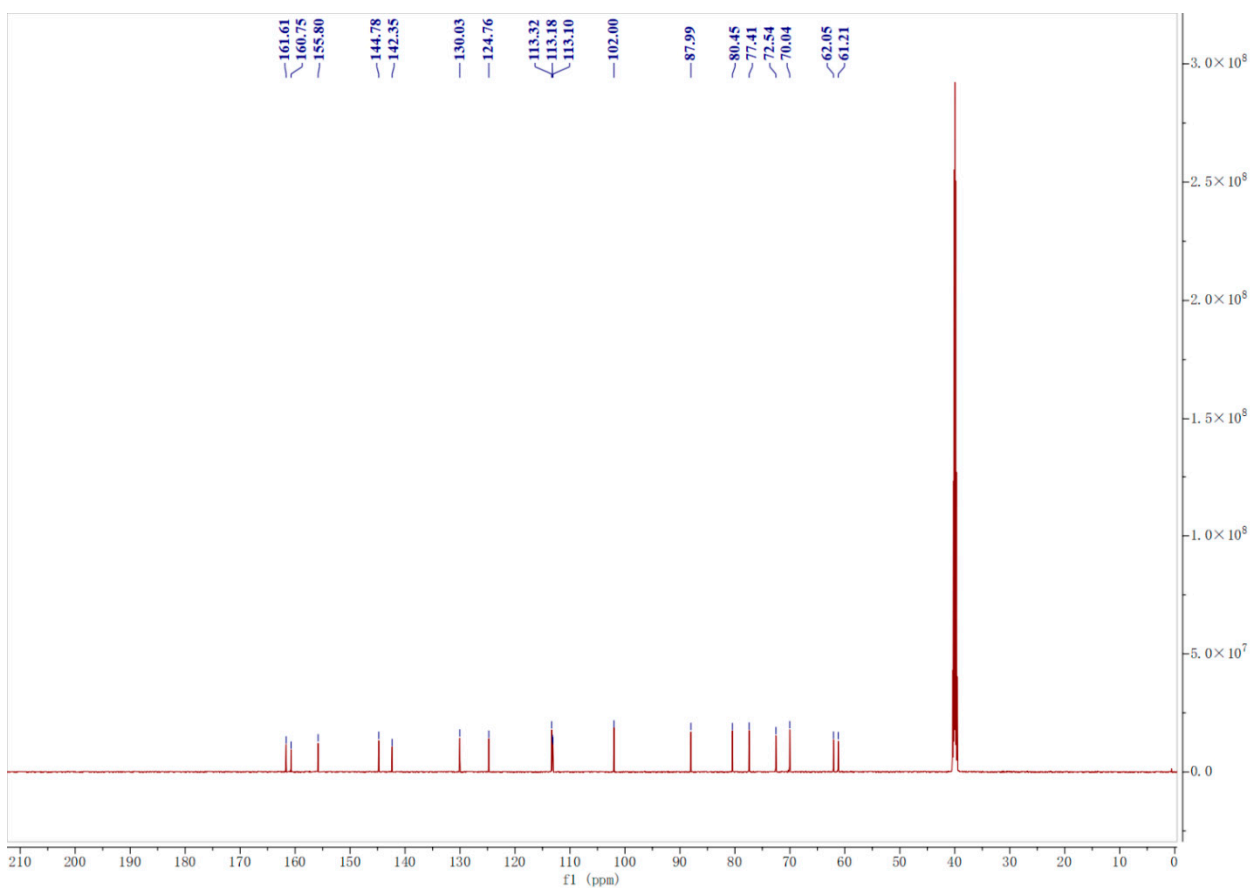

Figures S3. The  $^1\text{H}$ -NMR spectrum of 7- [(1- $\beta$ -D-galactopyranosyl-1H-1,2,3-triazol-4-yl) methoxy]-2H-chromen-2-one (**10b**)

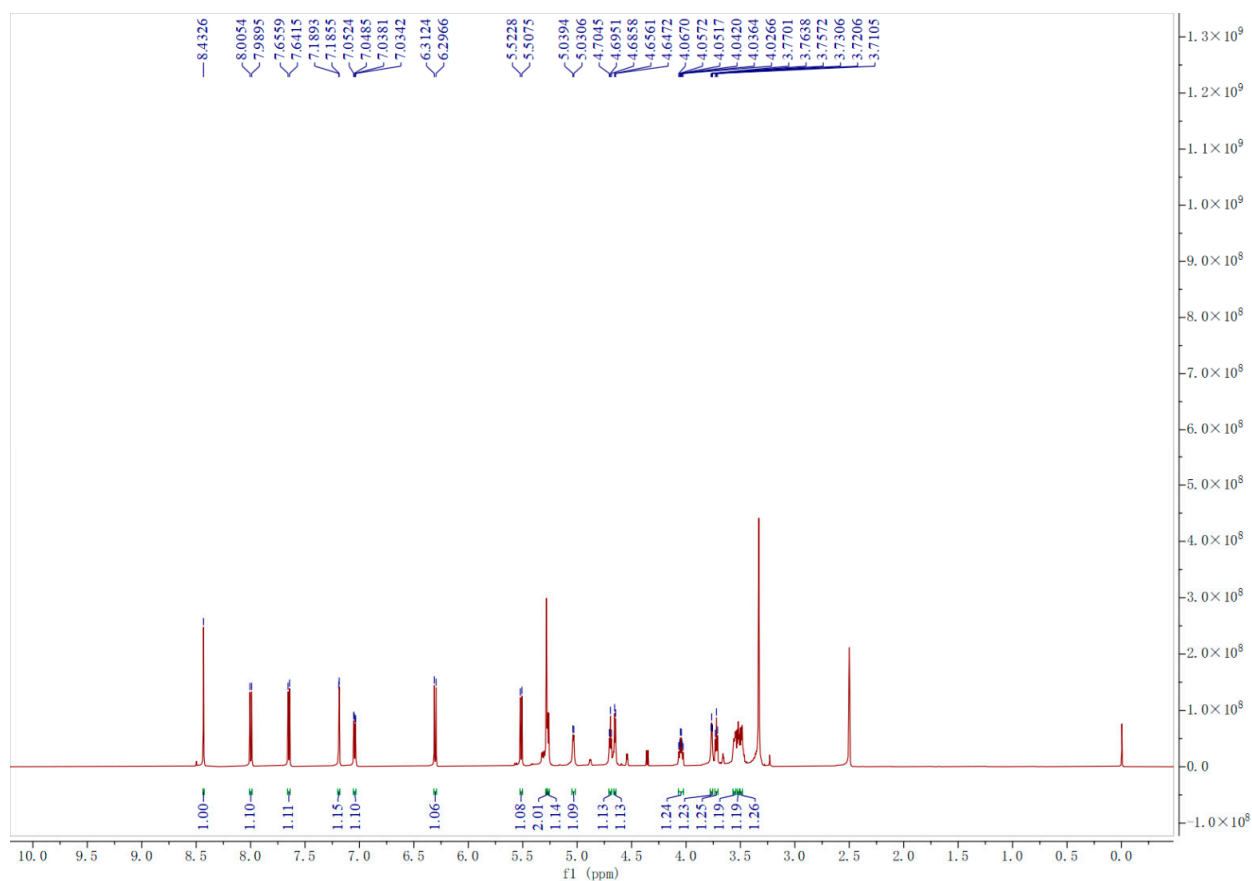

Figures S4. The  $^{13}\text{C}$ -NMR spectrum of 7- [(1- $\beta$ -D-galactopyranosyl-1H-1,2,3-triazol-4-yl) methoxy]-2H-chromen-2-one (**10b**)

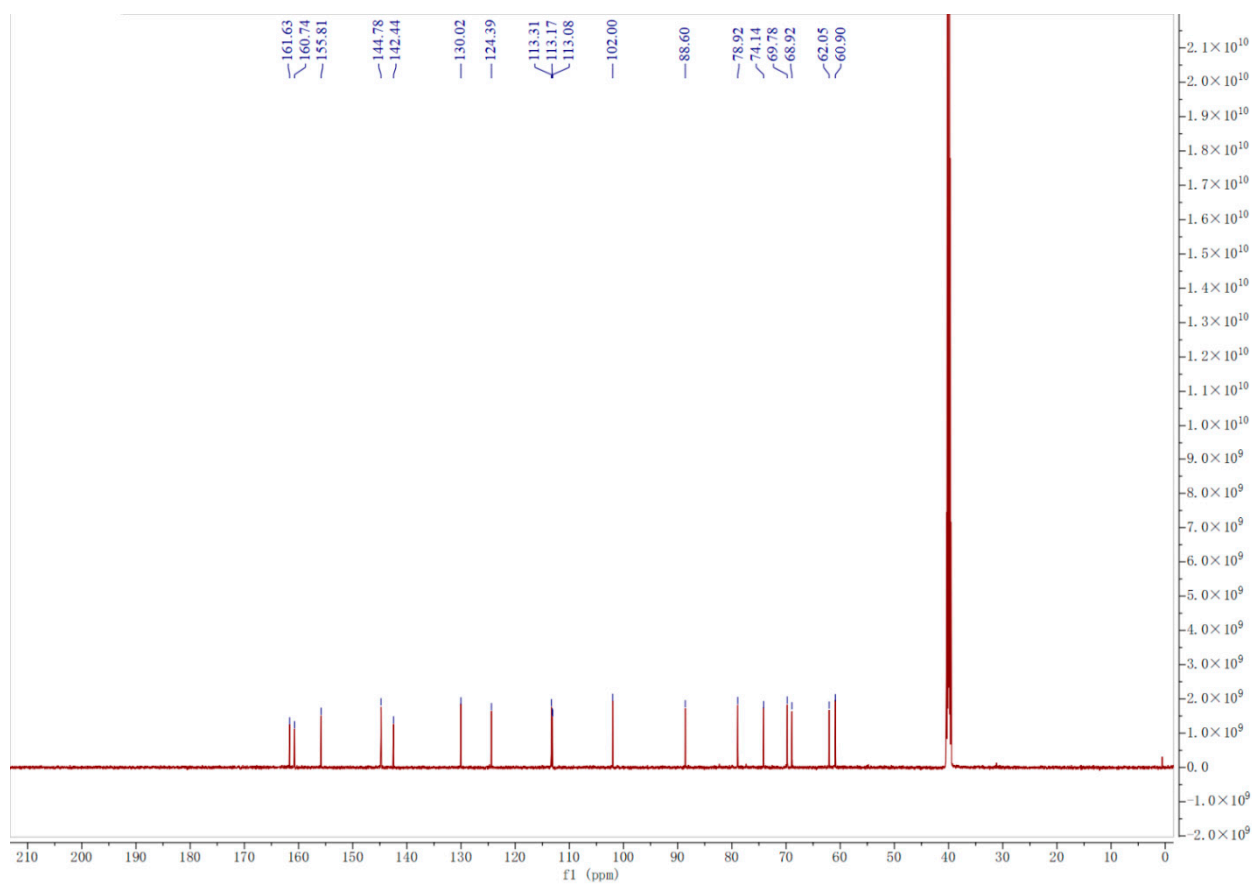

Figures S5. The  $^1\text{H}$ -NMR spectrum of 7- [(1- $\beta$ -D-mannopyranosyl-1H-1,2,3-triazol-4-yl) methoxy]-2H-chromen-2-one (**10c**)

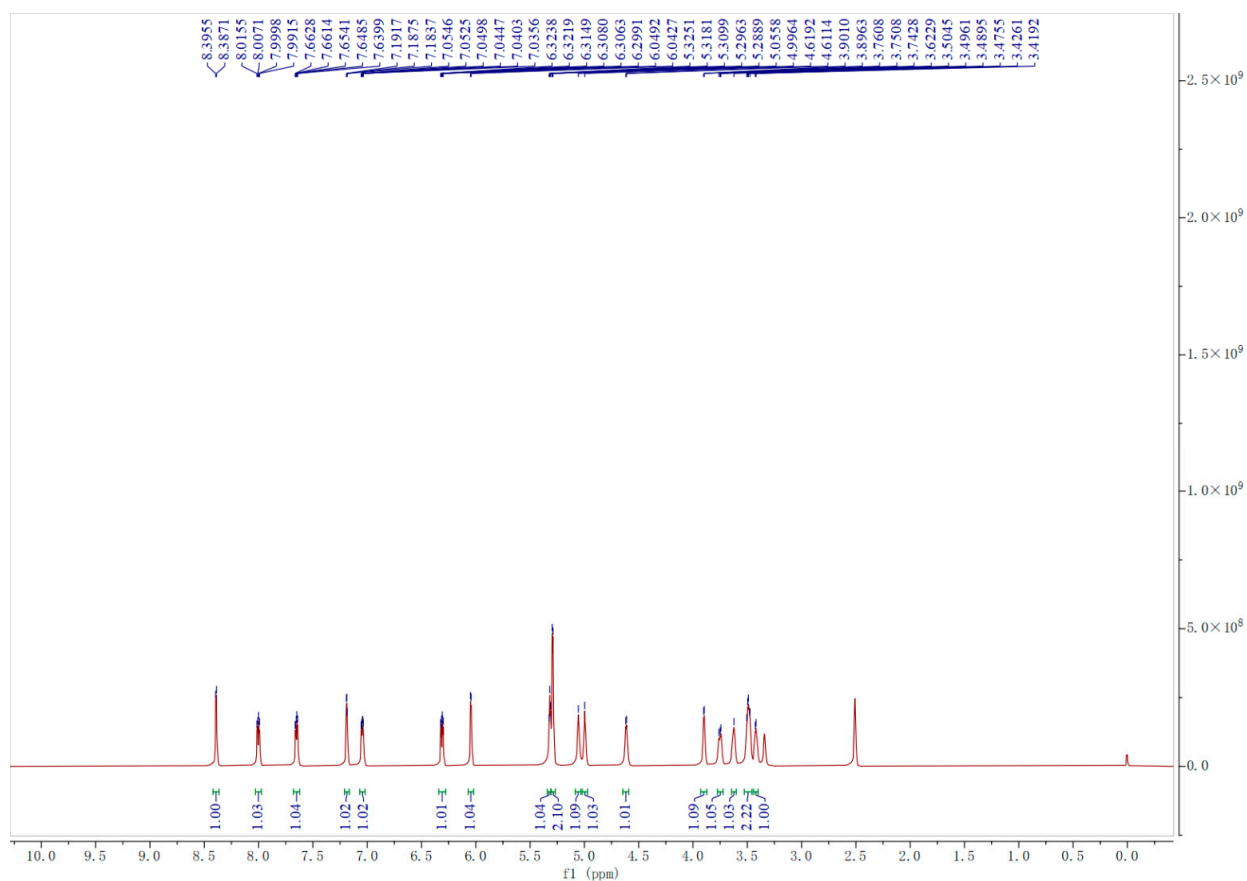

Figures S6. The  $^{13}\text{C}$ -NMR spectrum of 7- [(1- $\beta$ -D-mannopyranosyl-1H-1,2,3-triazol-4-yl) methoxy]-2H-chromen-2-one (**10c**)

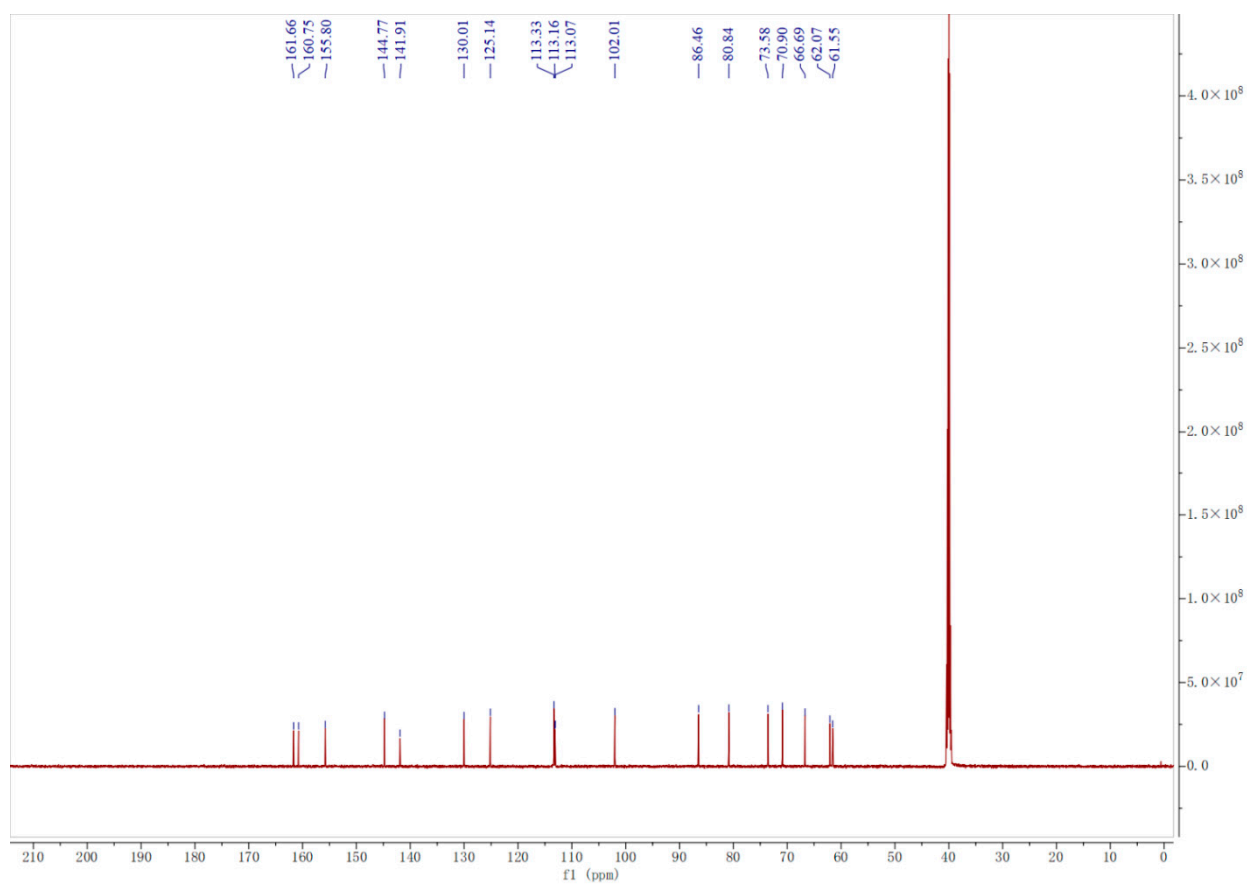

Figures S7. The  $^1\text{H}$ -NMR spectrum of 7- [(1- $\beta$ -D-glucosaminogly-1H-1,2,3-triazol-4-yl) methoxy]-2H-chromen-2-one (**10d**)

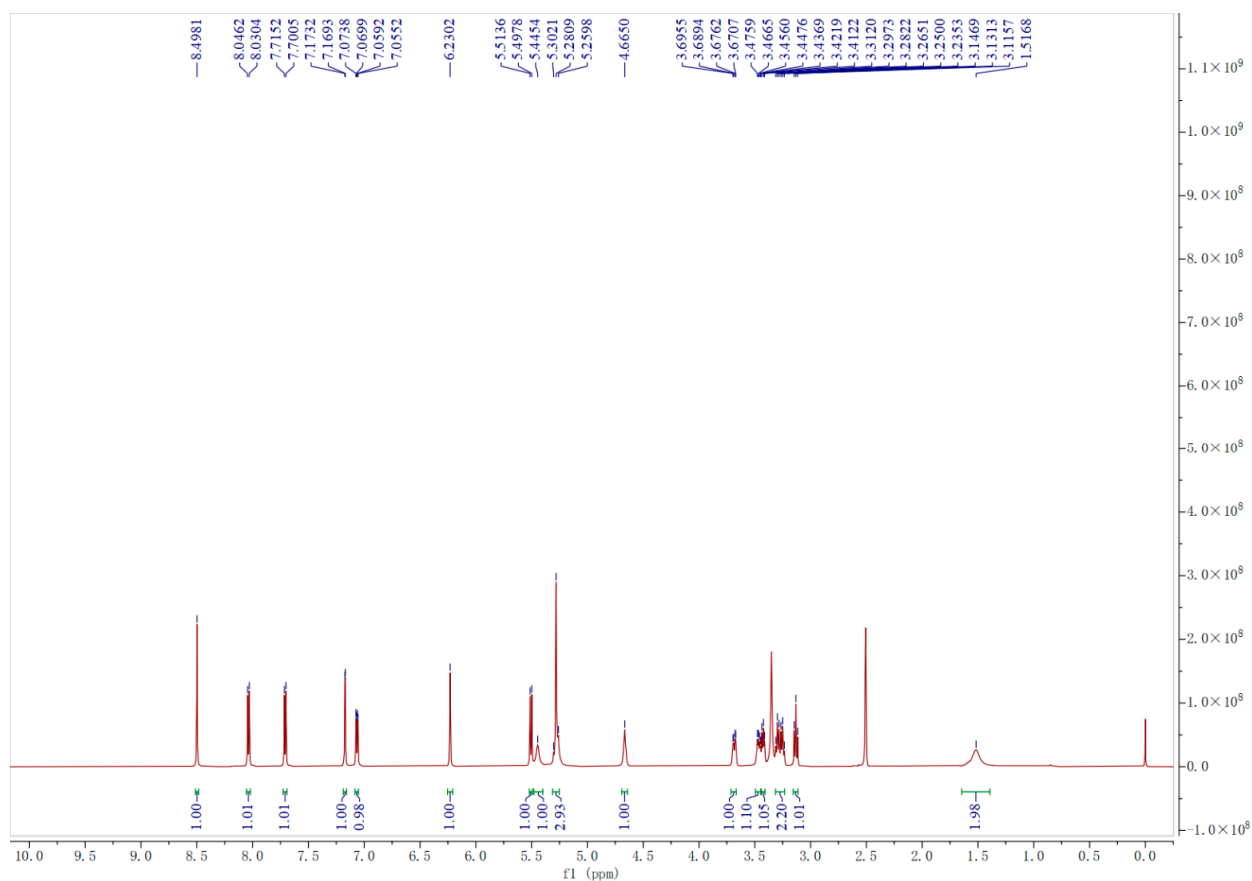

Figures S8. The  $^{13}\text{C}$ -NMR spectrum of 7- [(1- $\beta$ -D-glucosaminogly-1H-1,2,3-triazol-4-yl) methoxy]-2H-chromen-2-one (**10d**)

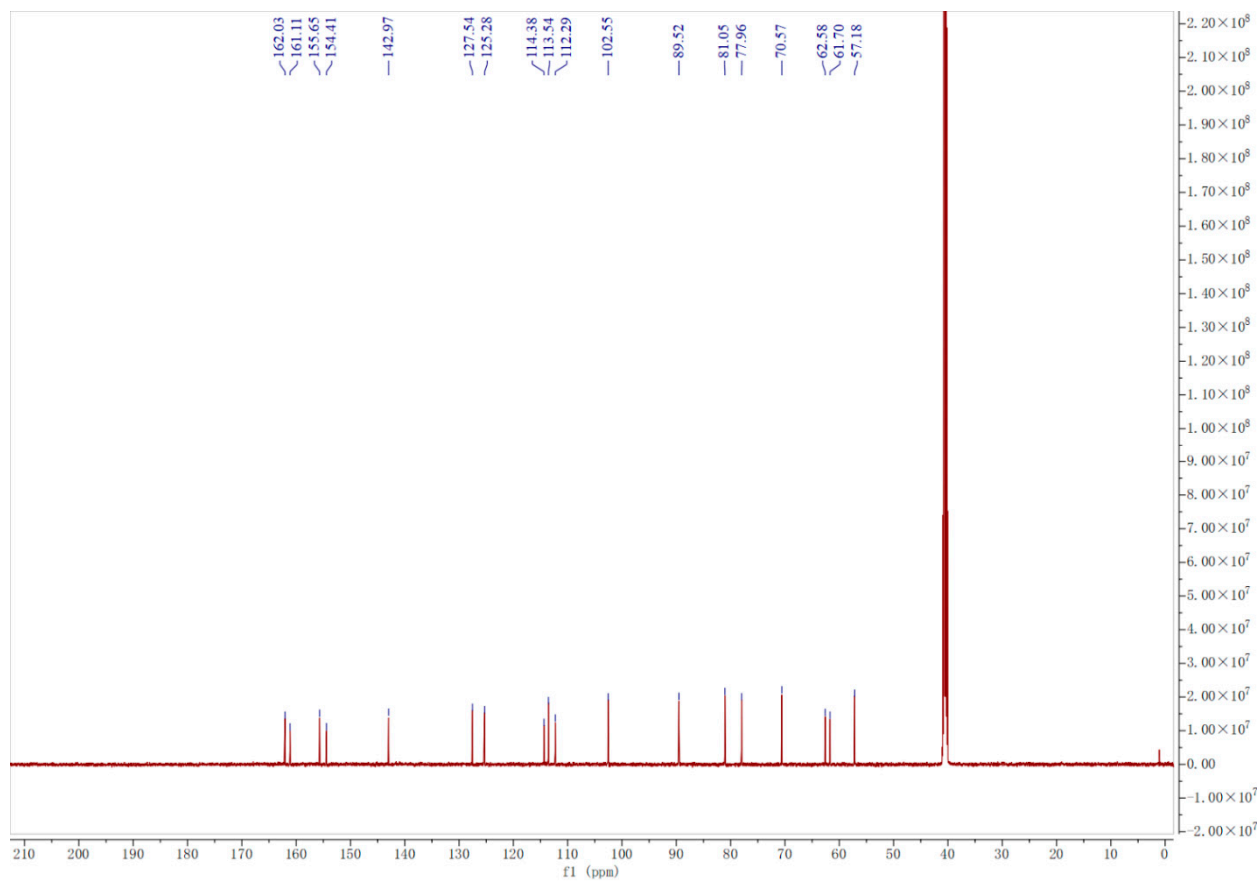

Figures S9. The  $^1\text{H}$ -NMR spectrum of 7-[(1- $\beta$ -D-xylopyranosyl-1H-1,2,3-triazol-4-yl) methoxy]-2H-chromen-2-one (**10e**)

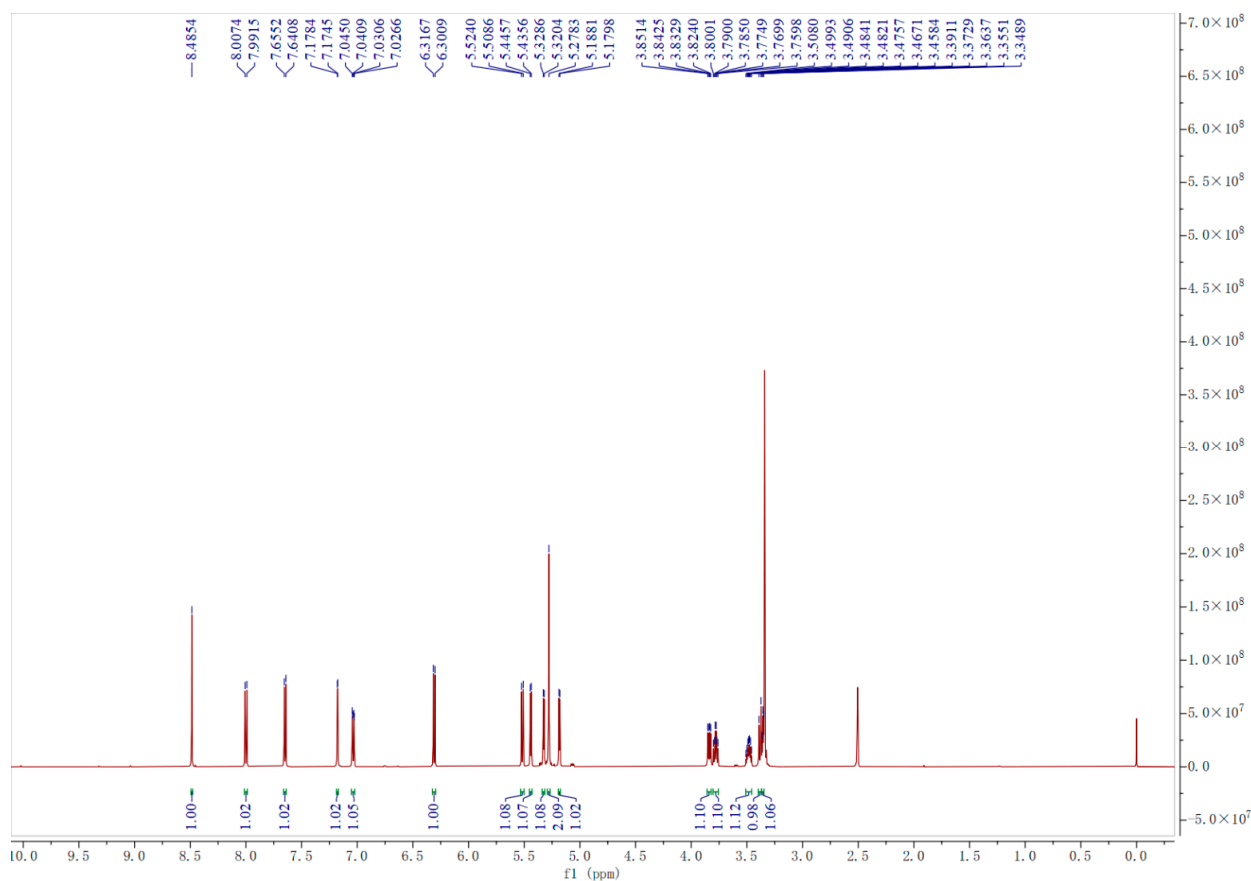

Figures S10. The  $^{13}\text{C}$ -NMR spectrum of 7-[(1- $\beta$ -D-xylopyranosyl-1H-1,2,3-triazol-4-yl) methoxy]-2H-chromen-2-one (**10e**)

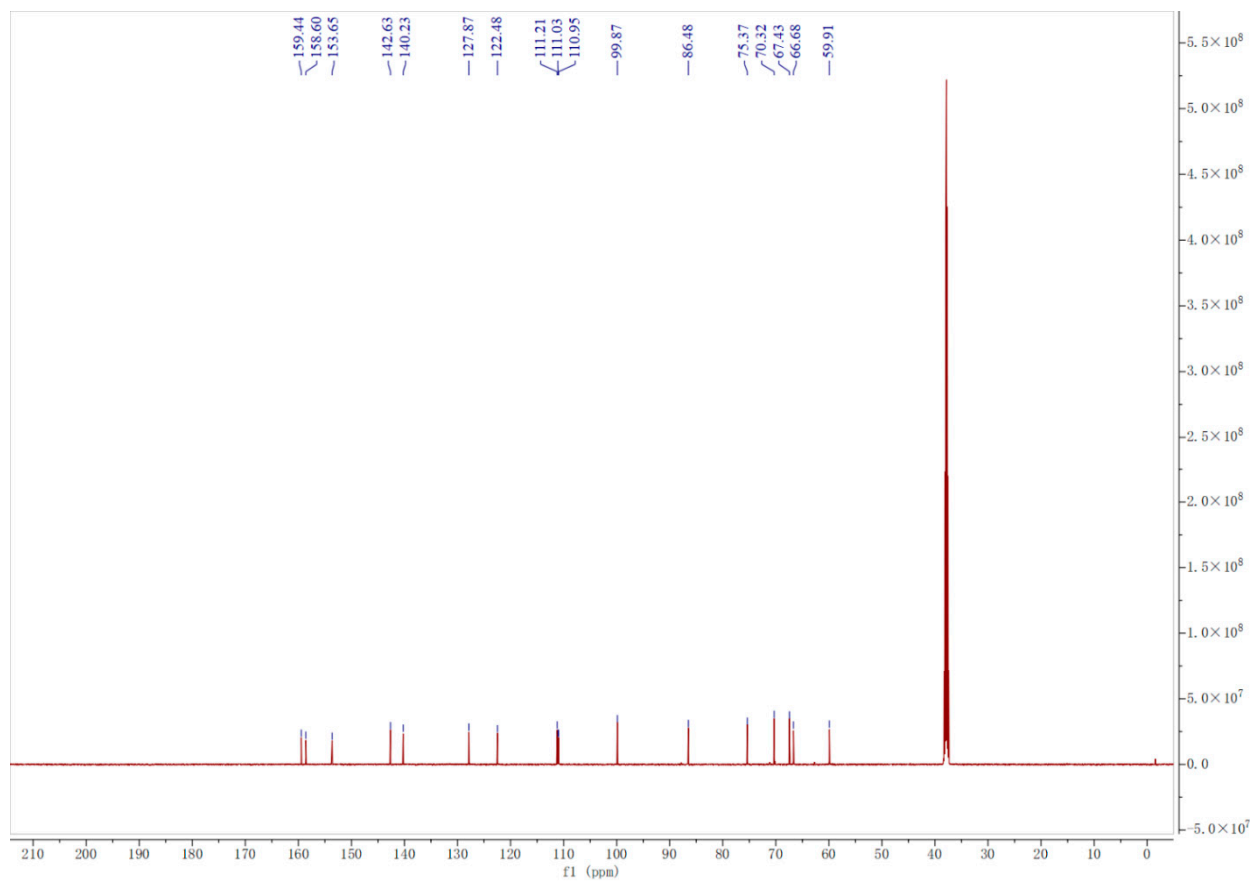

Figures S11. The  $^1\text{H}$ -NMR spectrum of 7- [(1- $\beta$ -L-arabinopyranosyl-1H-1,2,3-triazol-4-yl) methoxy]-2H-chromen-2-one (**10f**)

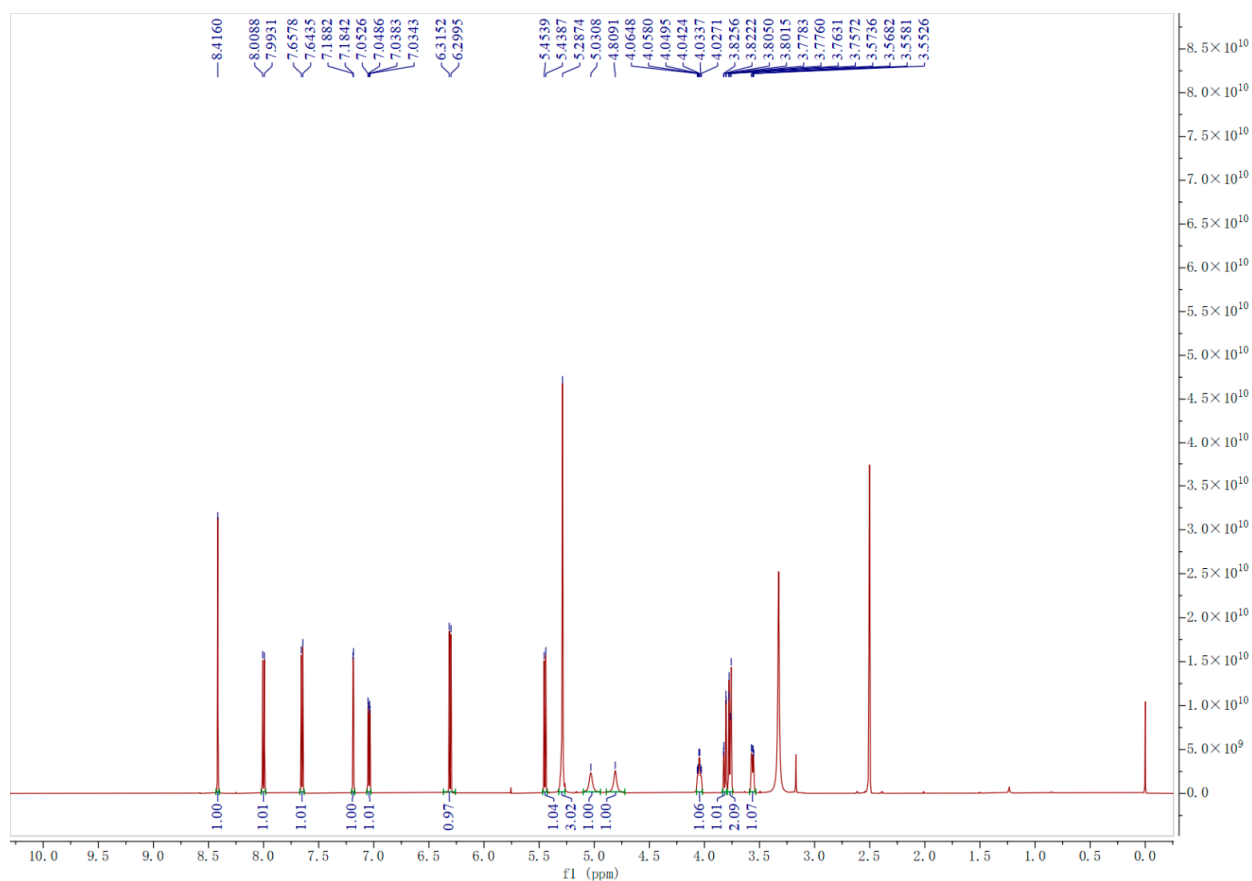

Figures S12. The  $^{13}\text{C}$ -NMR spectrum of 7- [(1- $\beta$ -L-arabinopyranosyl-1H-1,2,3-triazol-4-yl) methoxy]-2H-chromen-2-one (**10f**)

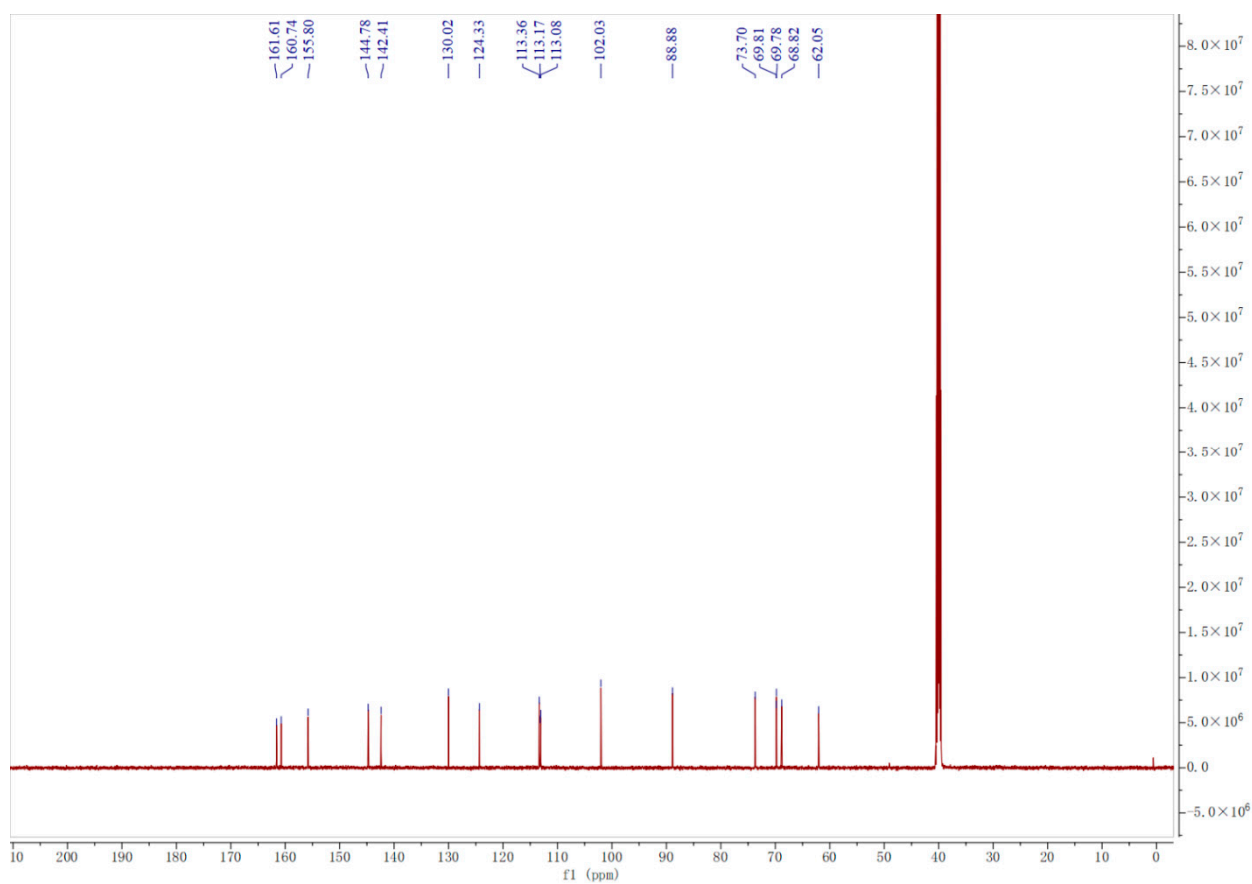

Figures S13. The  $^1\text{H}$ -NMR spectrum of 7- [(1- $\beta$ -L-rhamnosyl-1H-1,2,3-triazol-4-yl) methoxy]-2H-chromen-2-one (**10g**)

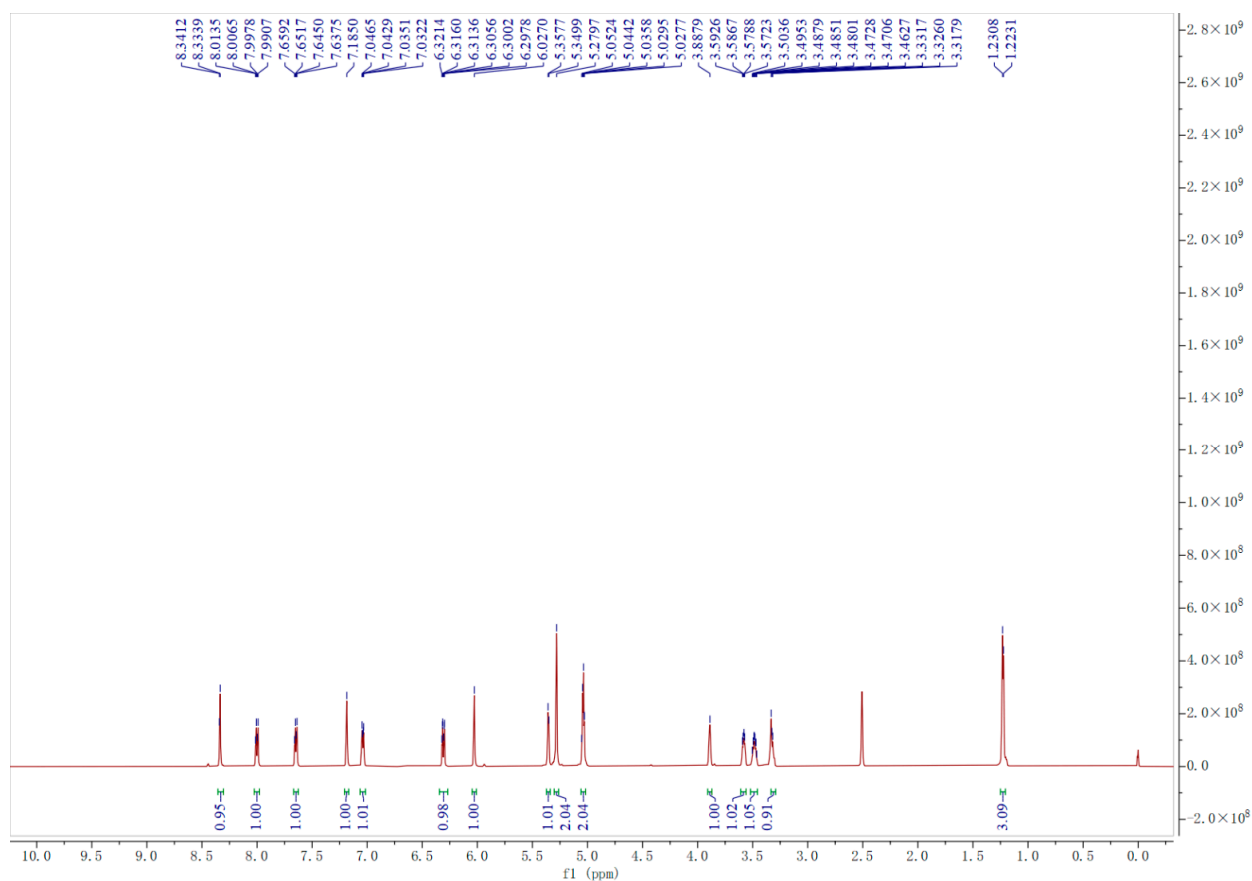

Figures S14. The  $^{13}\text{C}$ -NMR spectrum of 7- [(1- $\beta$ -L-rhamnosyl-1H-1,2,3-triazol-4-yl) methoxy]-2H-chromen-2-one (**10g**)

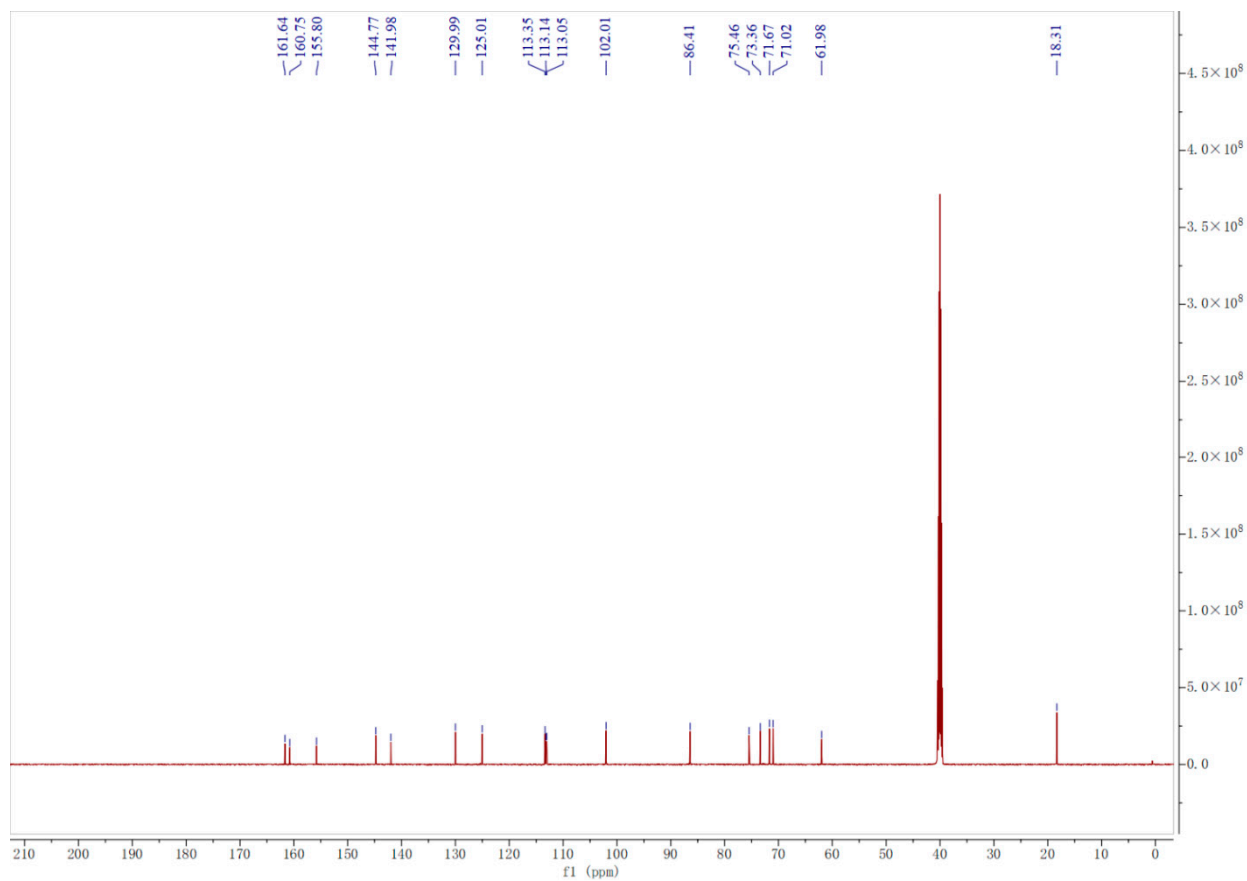



Figures S15. The  $^1\text{H}$ -NMR spectrum of 7- [(1- $\beta$ -D-ribofuranosyl-1H-1,2,3-triazol-4-yl) methoxy]-2H-chromen-2-one (**10h**)

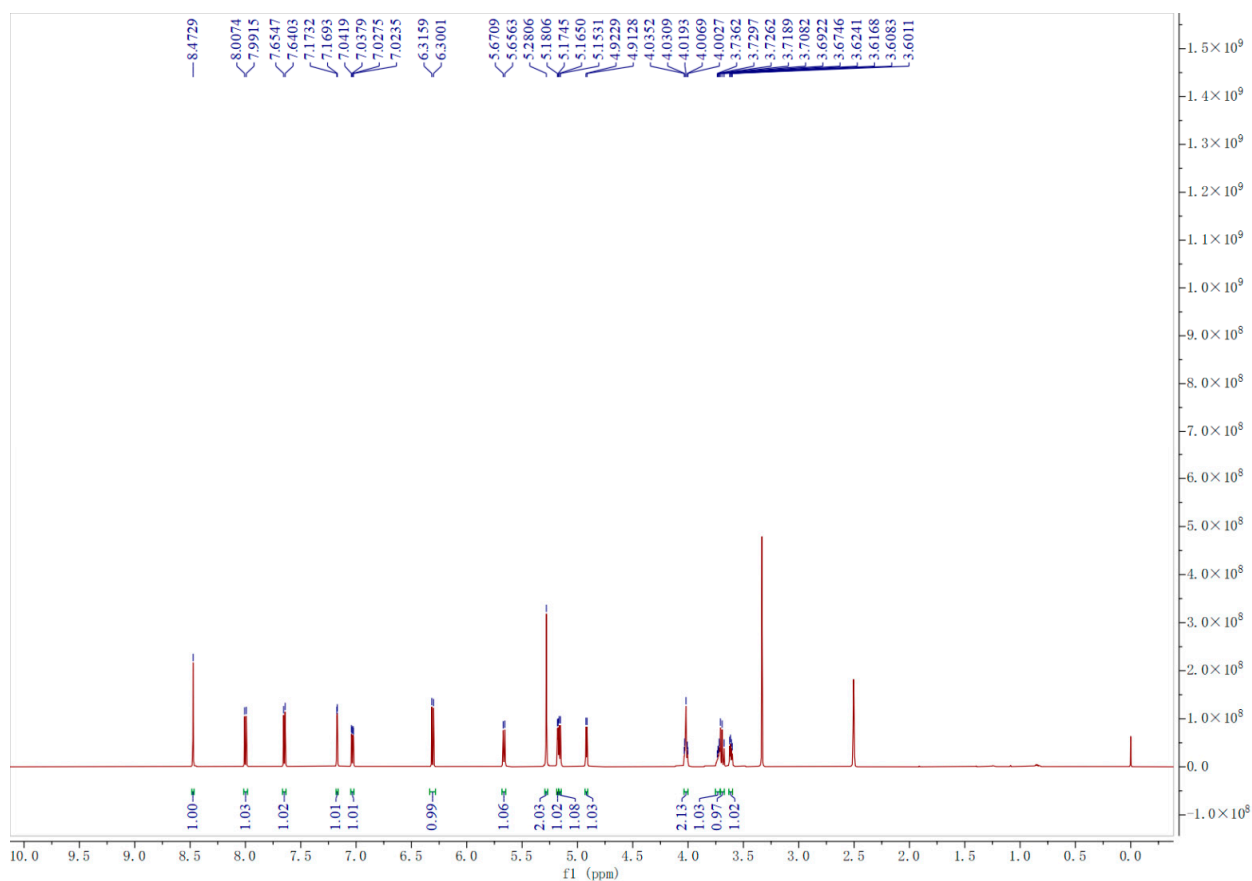

Figures S16. The  $^{13}\text{C}$ -NMR spectrum of 7- [(1- $\beta$ -D-ribofuranosyl-1H-1,2,3-triazol-4-yl) methoxy]-2H-chromen-2-one (**10h**)

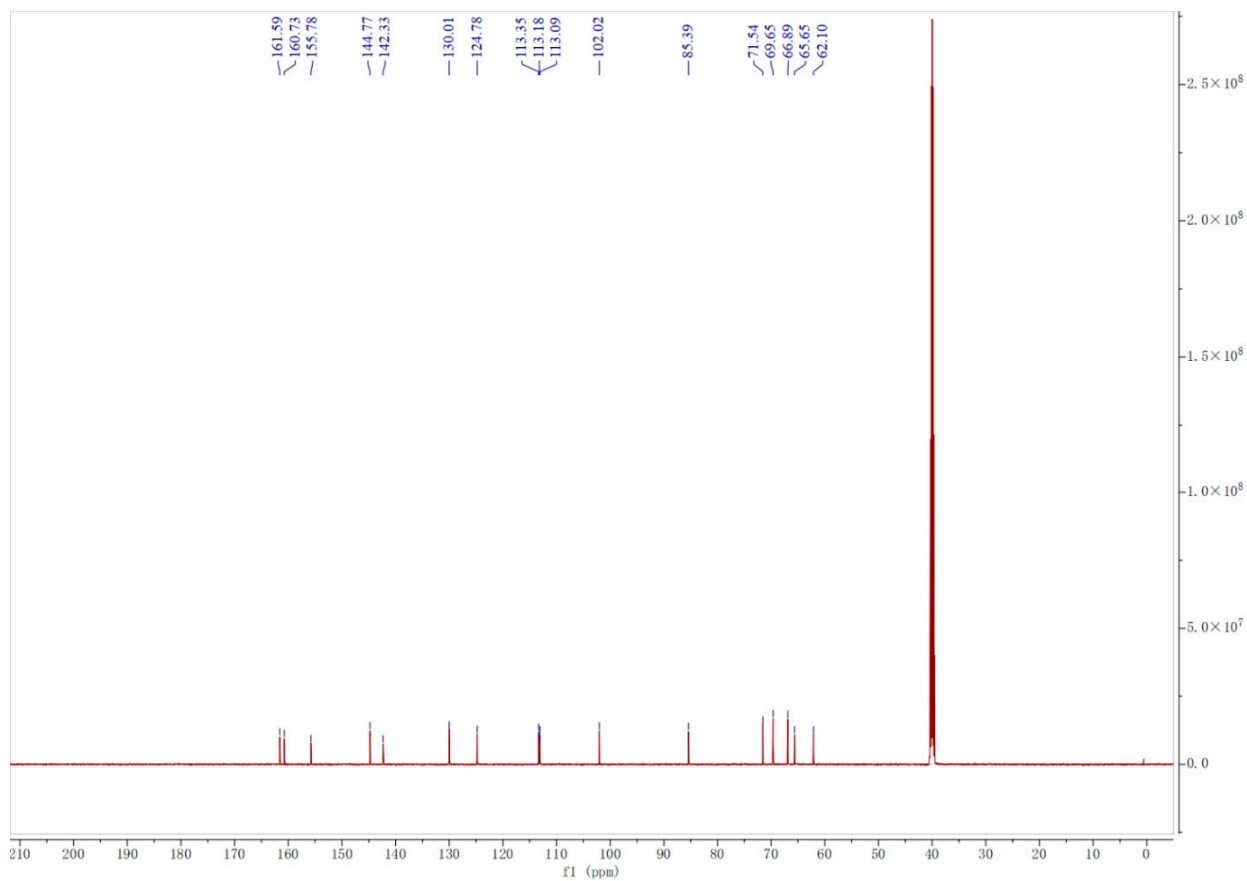

Figures S17. The  $^1\text{H}$ -NMR spectrum of 7- [(1- $\beta$ -D-glucopyranosyl-1H-1,2,3-triazol-4-yl) methoxy]-4-methyl-2H-chromen-2-one (**10i**)

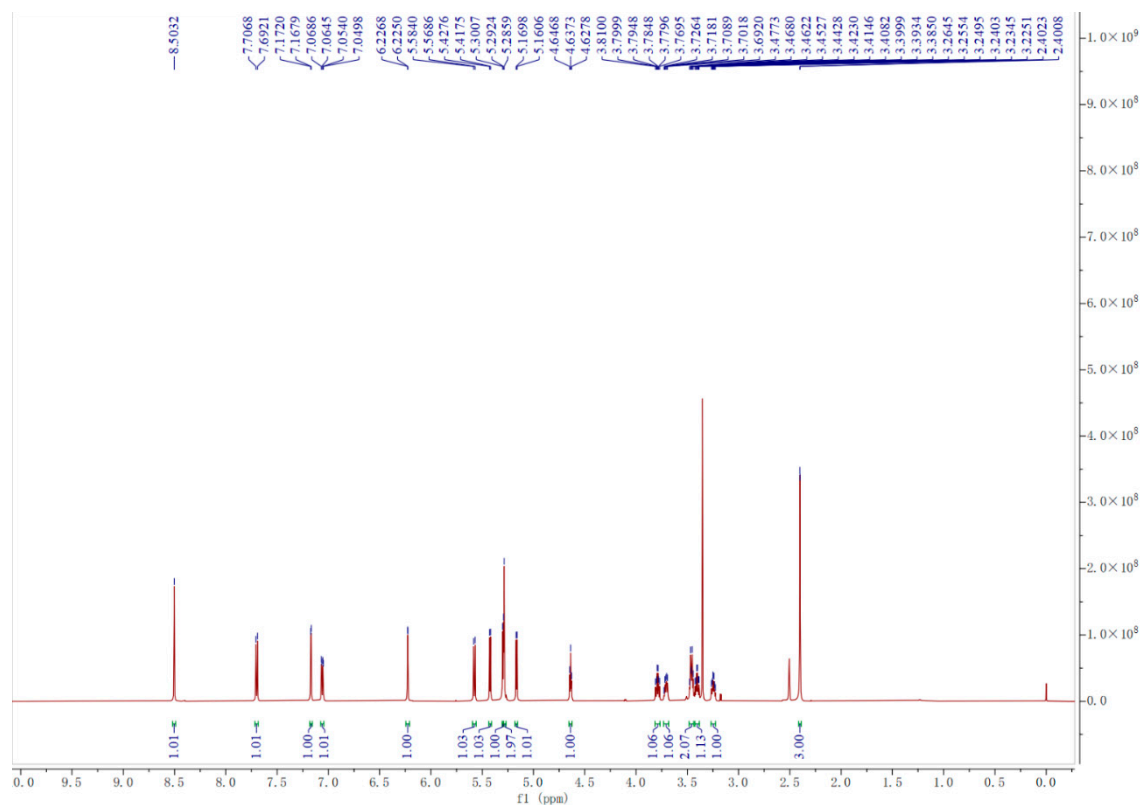

Figures S18. The  $^{13}\text{C}$ -NMR spectrum of 7- [(1- $\beta$ -D-glucopyranosyl-1H-1,2,3-triazol-4-yl) methoxy]-4-methyl-2H-chromen-2-one (**10i**)

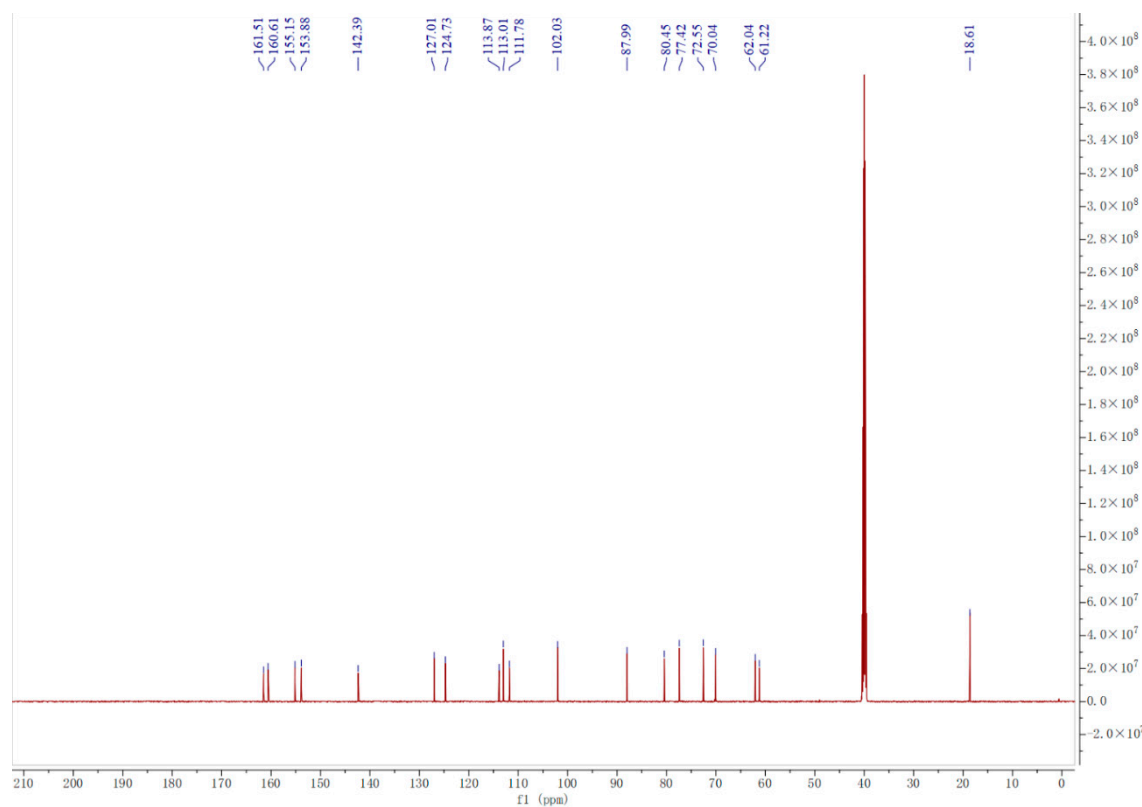

*one* (**10j**)

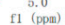

*one* (**10j**)

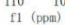

Figures S21. The  $^1\text{H}$ -NMR spectrum of 7- [(1- $\beta$ -D-mannopyranosyl-1H-1,2,3-triazol-4-yl) methoxy]-4-methyl-2H-chromen-2-one (10k)

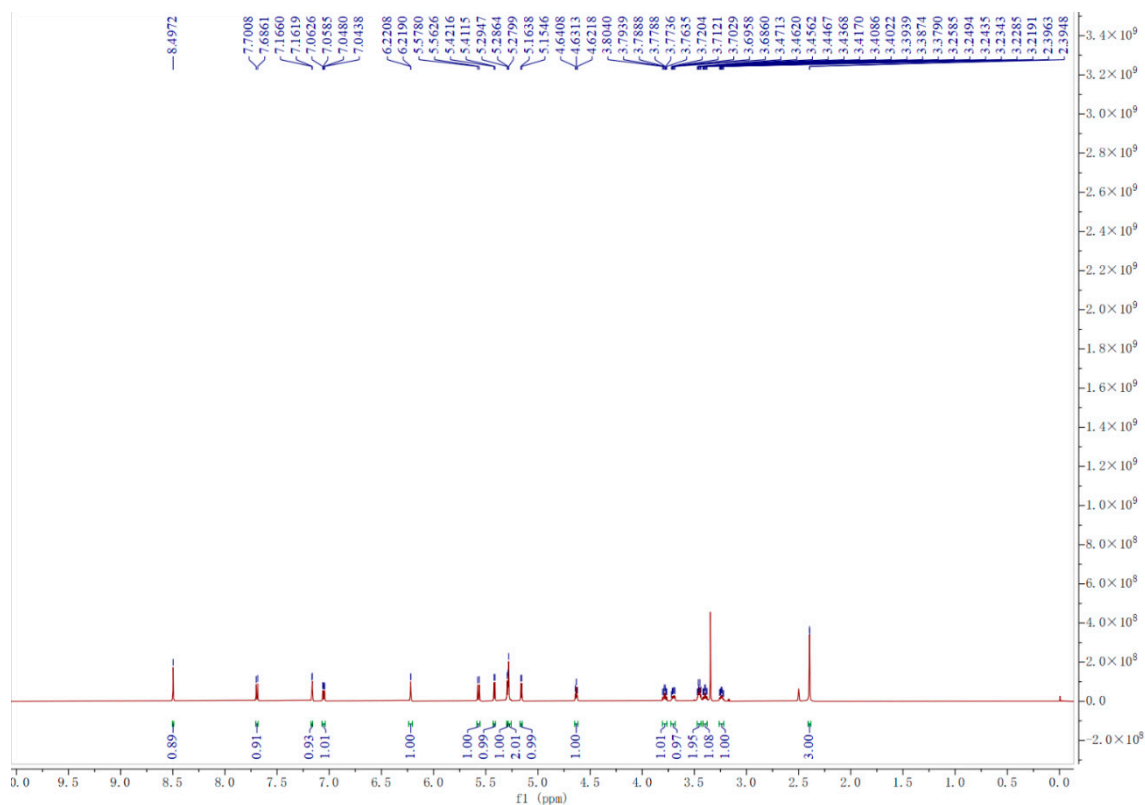

Figures S22. The  $^{13}\text{C}$ -NMR spectrum of 7- [(1- $\beta$ -D-mannopyranosyl-1H-1,2,3-triazol-4-yl) methoxy]-4-methyl-2H-chromen-2-one (10k)

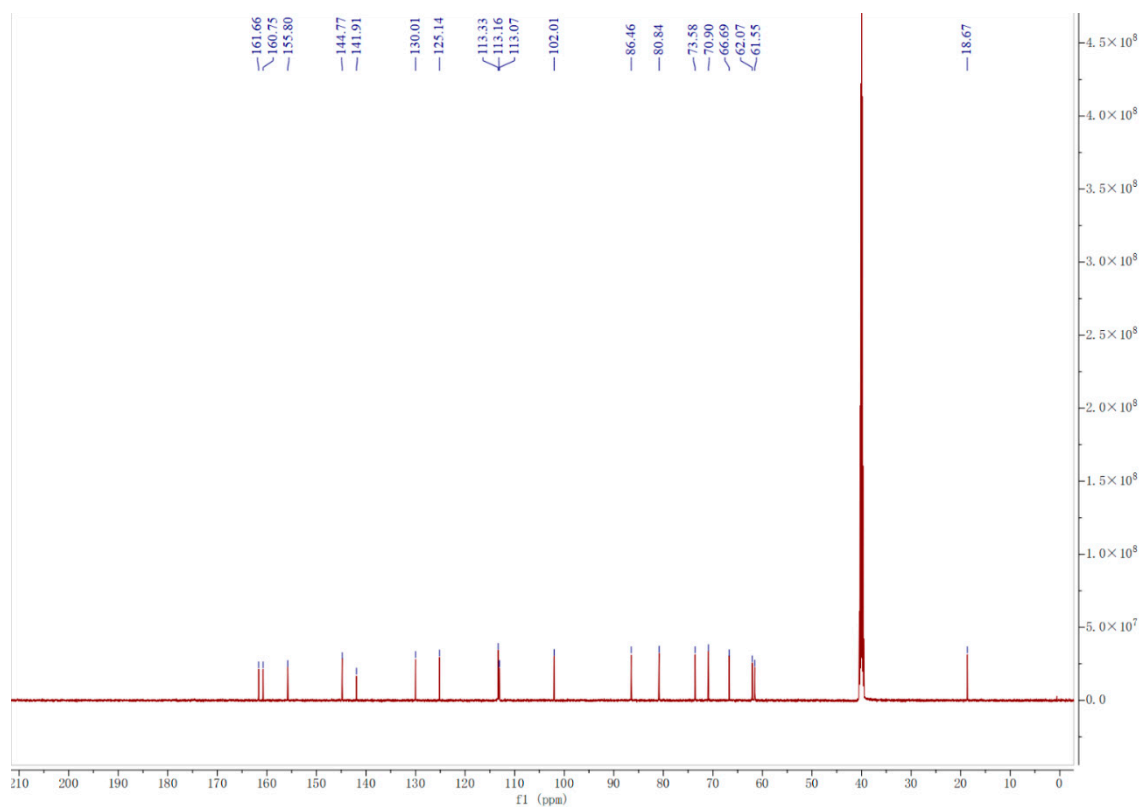

Figures S23. The  $^1\text{H}$ -NMR spectrum of 7- [(1- $\beta$ -D-glucosaminogly-1H-1,2,3-triazol-4-yl) methoxy]-4-methyl-2H-chromen-2-one (**101**)

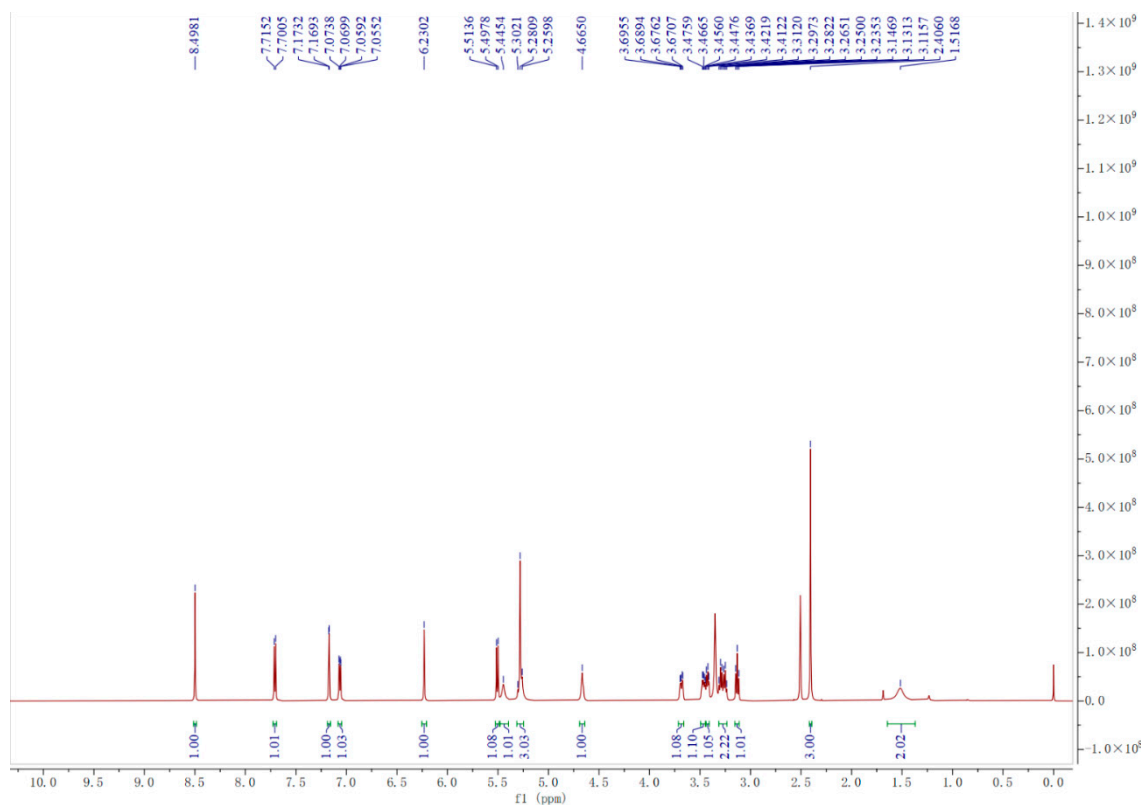

Figures S24. The  $^{13}\text{C}$ -NMR spectrum of 7- [(1- $\beta$ -D-glucosaminogly-1H-1,2,3-triazol-4-yl) methoxy]-4-methyl-2H-chromen-2-one (**101**)

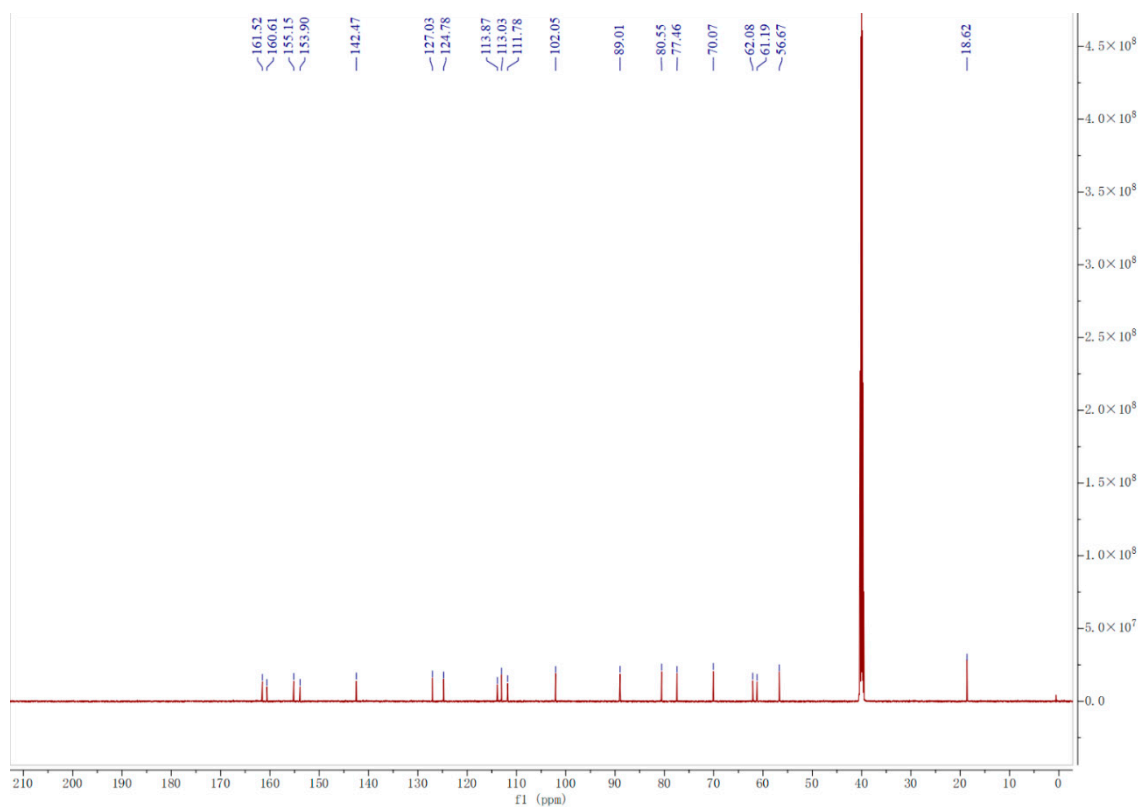

Figures S25. The  $^1\text{H}$ -NMR spectrum of 7- [(1- $\beta$ -D-xylopyranosyl-1H-1,2,3-triazol-4-yl) methoxy]-4-methyl-2H-chromen-2-one

(10m)

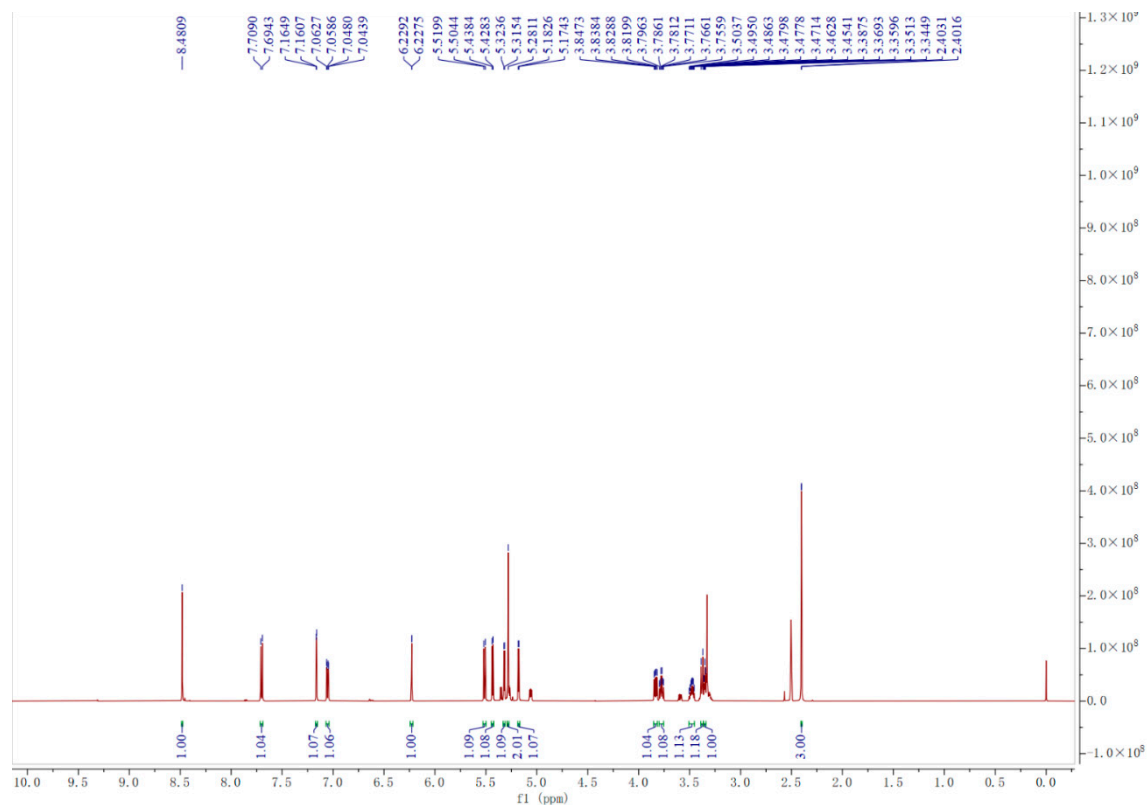

Figures S26. The  $^{13}\text{C}$ -NMR spectrum of 7- [(1- $\beta$ -D-xylopyranosyl-1H-1,2,3-triazol-4-yl) methoxy]-4-methyl-2H-chromen-2-one

one (10m)

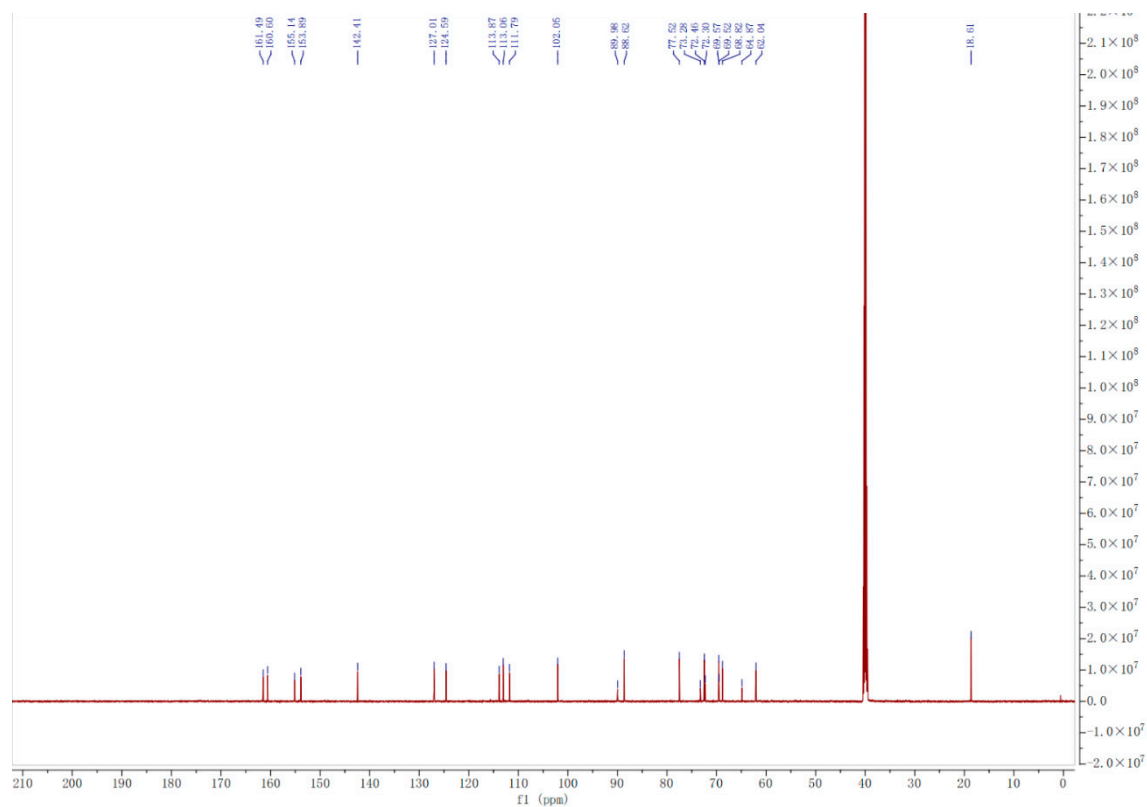

Figures S27. The  $^1\text{H}$ -NMR spectrum of 7- [(1- $\beta$ -L-arabinopyranosyl-1H-1,2,3-triazol-4-yl) methoxy]-4-methyl-2H-chromen-2-one (**10n**)

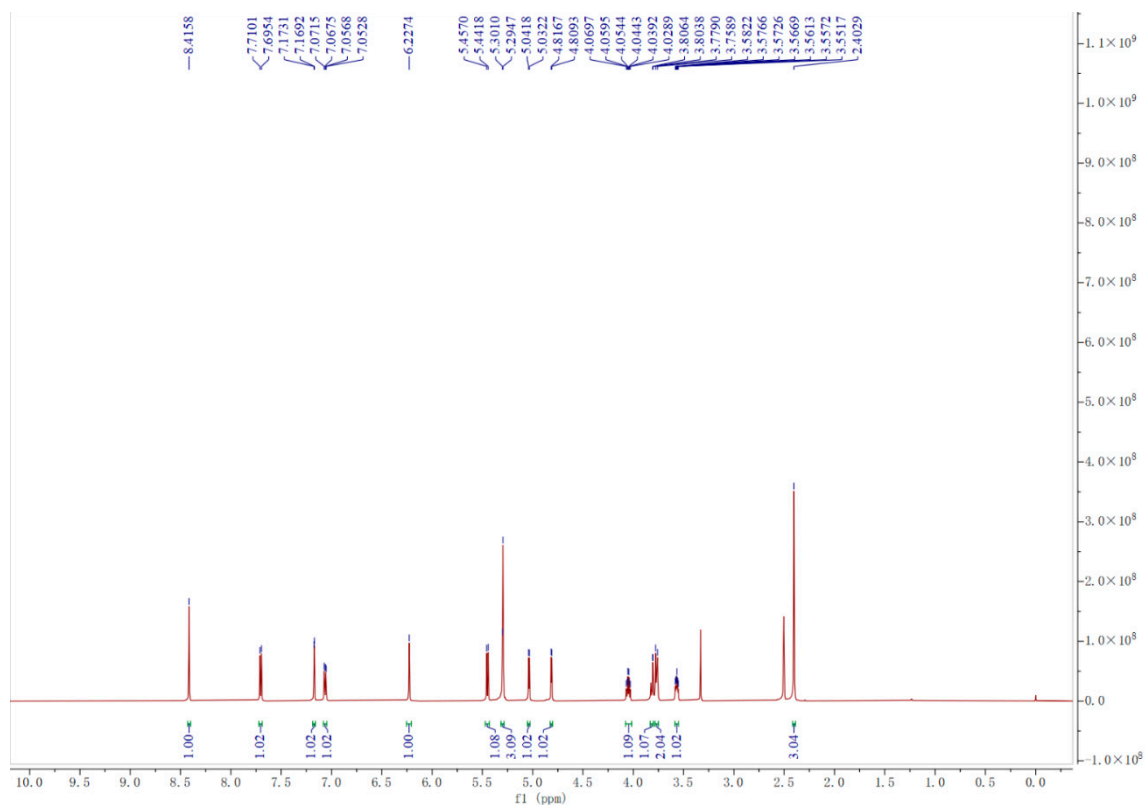

Figures S28. The  $^{13}\text{C}$ -NMR spectrum of 7- [(1- $\beta$ -L-arabinopyranosyl-1H-1,2,3-triazol-4-yl) methoxy]-4-methyl-2H-chromen-2-one (**10n**)

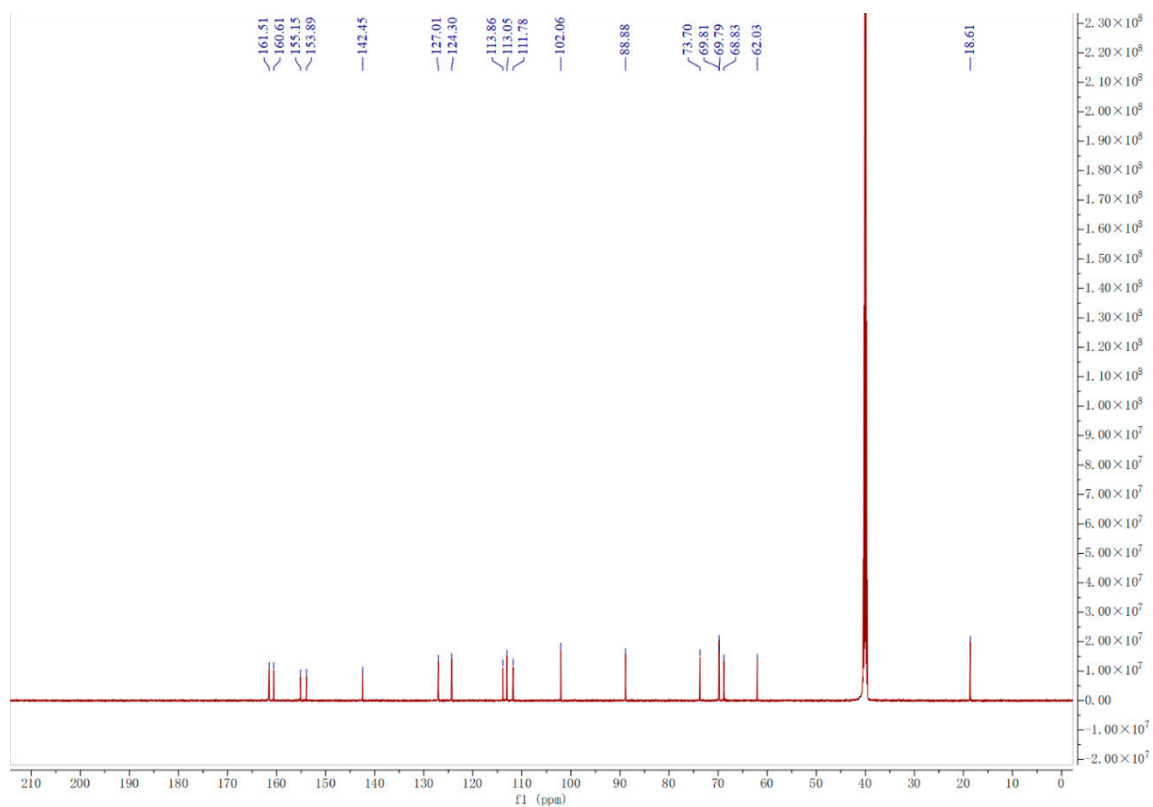

Figures S29. The  $^1\text{H}$ -NMR spectrum of 7- [(1- $\beta$ -L-rhamnosyl-1H-1,2,3-triazol-4-yl) methoxy]-4-methyl-2H-chromen-2-one

(10o)

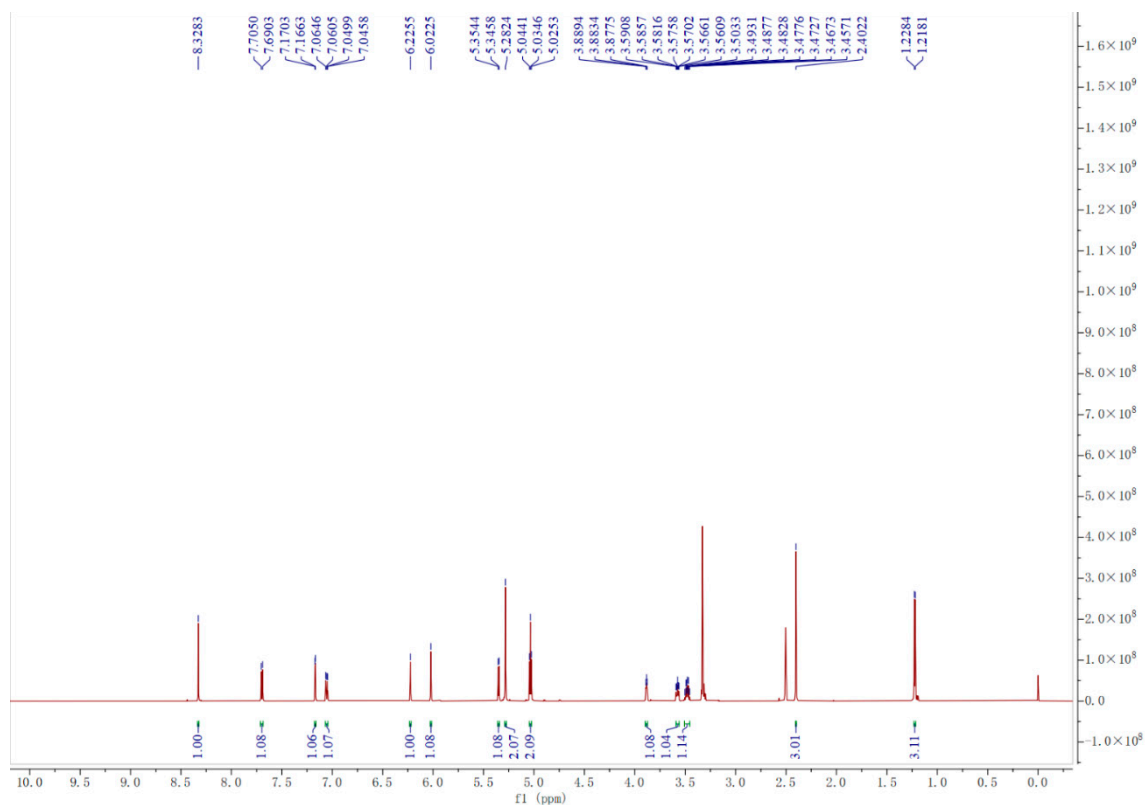

Figures S30. The  $^{13}\text{C}$ -NMR spectrum of 7- [(1- $\beta$ -L-rhamnosyl-1H-1,2,3-triazol-4-yl) methoxy]-4-methyl-2H-chromen-2-one

(10o)

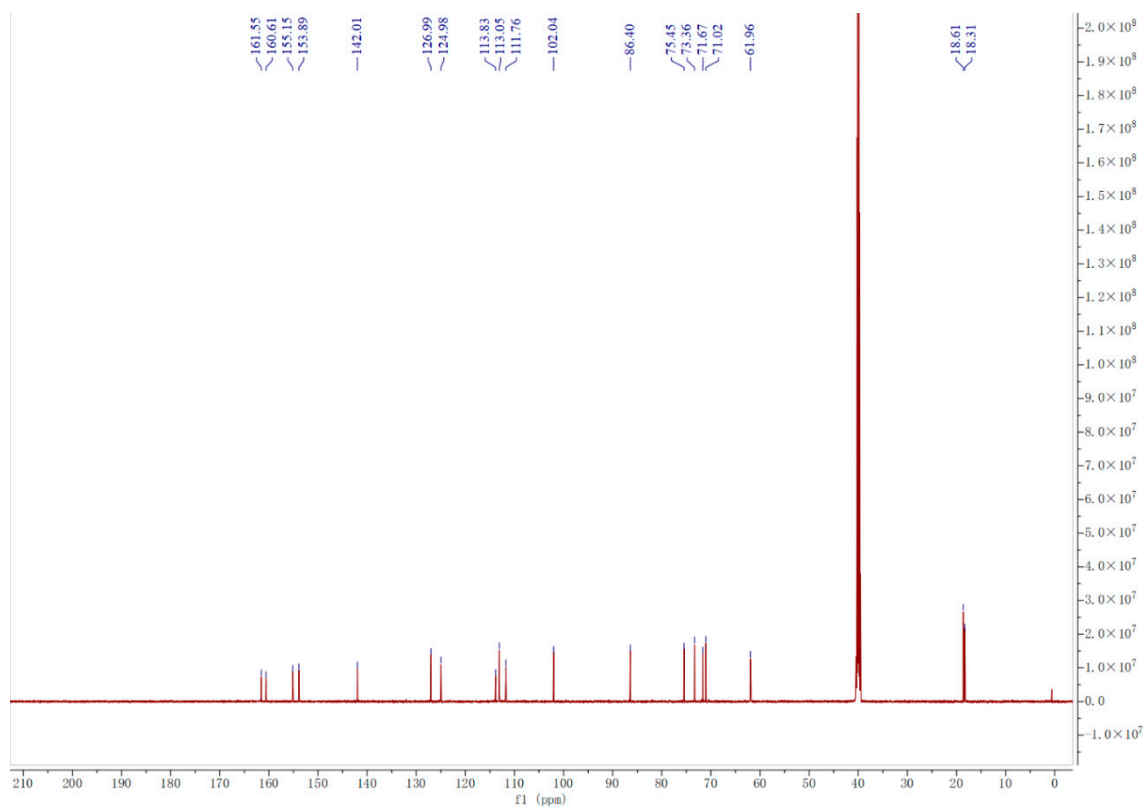



Figures S31. The  $^1\text{H}$ -NMR spectrum of 7- [(1- $\beta$ -D-ribofuranosyl-1H-1,2,3-triazol-4-yl) methoxy]-4-methyl-2H-chromen-2-one

(10p)

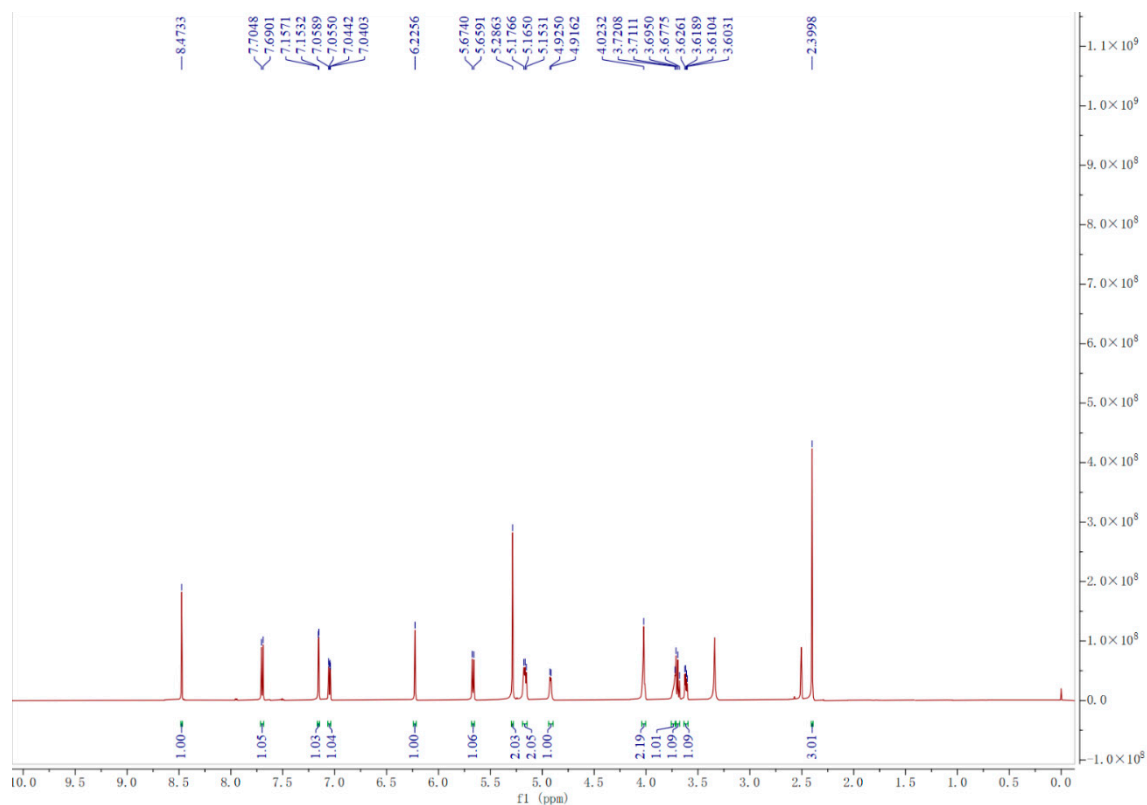

Figures S32. The  $^{13}\text{C}$ -NMR spectrum of 7- [(1- $\beta$ -D-ribofuranosyl-1H-1,2,3-triazol-4-yl) methoxy]-4-methyl-2H-chromen-2-one

(10p)

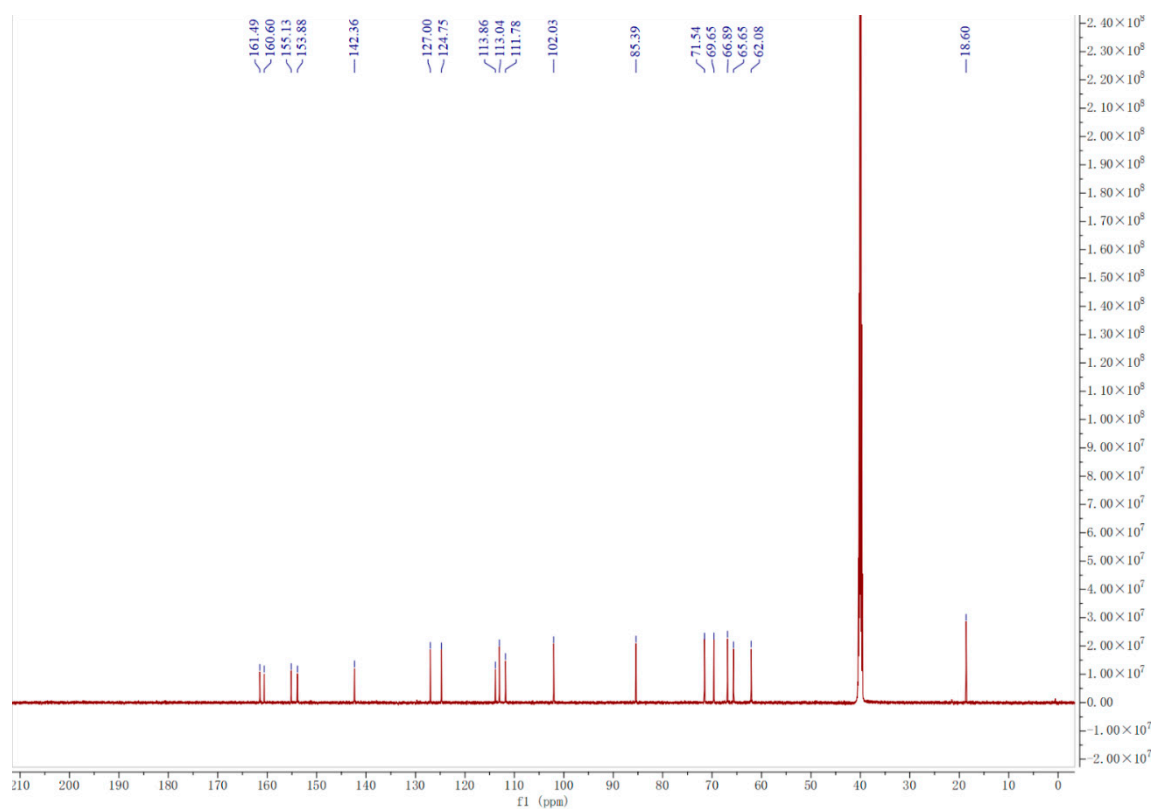

Supplement: s1 [file s1]
